# Supplementary material for: Adhesion and mechanical properties of poly(dimethylsiloxane) bottlebrush elastomers
Source: Royal Society of Chemistry journal article supplement (doi:10.1039/d3sm00346a), 2023-01-01
Supplement: d3sm00346a1.pdf [file d3sm00346a1.pdf]

## Supporting Information

# Adhesion and Mechanical Properties of Poly(dimethyl siloxane)

## Bottlebrush Elastomers

*Hyemin Kim, James J. Watkins\*, and Alfred J. Crosby\**

Department of Polymer Science and Engineering, University of Massachusetts Amherst,  
Amherst, Massachusetts 01003, United States

\* Corresponding Authors Email: [watkins@polysci.umass.edu](mailto:watkins@polysci.umass.edu) (J.J. Watkins) and  
[crosby@mail.pse.umass.edu](mailto:crosby@mail.pse.umass.edu) (A.J. Crosby)

**Table S1.** Macromonomers used for free radical polymerization

| Macromonomer | $M_n$ for $^1\text{H}$ NMR <sup>a</sup> | Polydispersity from GPC <sup>b</sup> |
|--------------|-----------------------------------------|--------------------------------------|
| MCR-M11      | 982 g/mol                               | 1.1                                  |
| DMS-R18      | 4530 g/mol                              | 1.1                                  |

a. In  $\text{CDCl}_3$  at 25 °C (500 MHz)

b. In THF at 25 °C



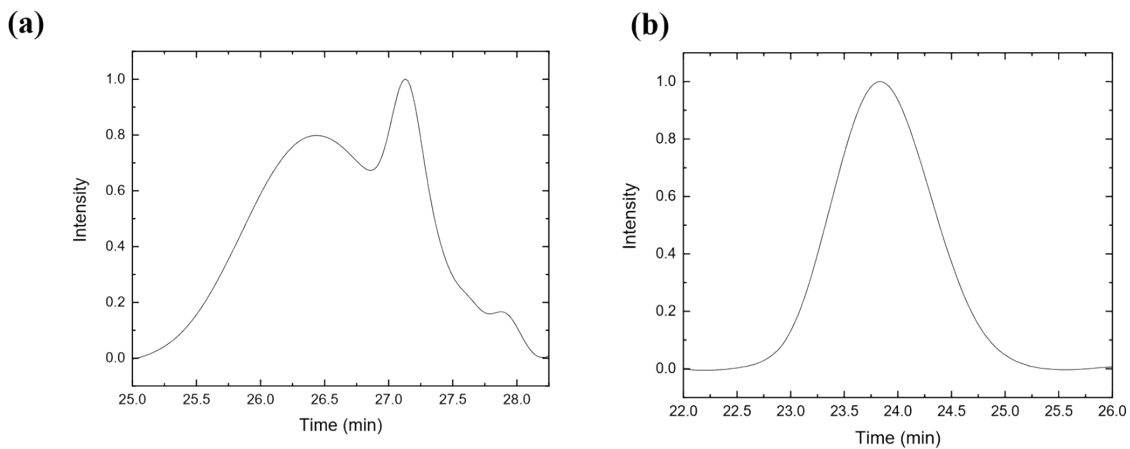

**Figure S3.** THF GPC of **(a)** MCR-M11 and **(b)** DMS-R18. The right half of **(a)** is distorted because it occurs outside the limits of detection.

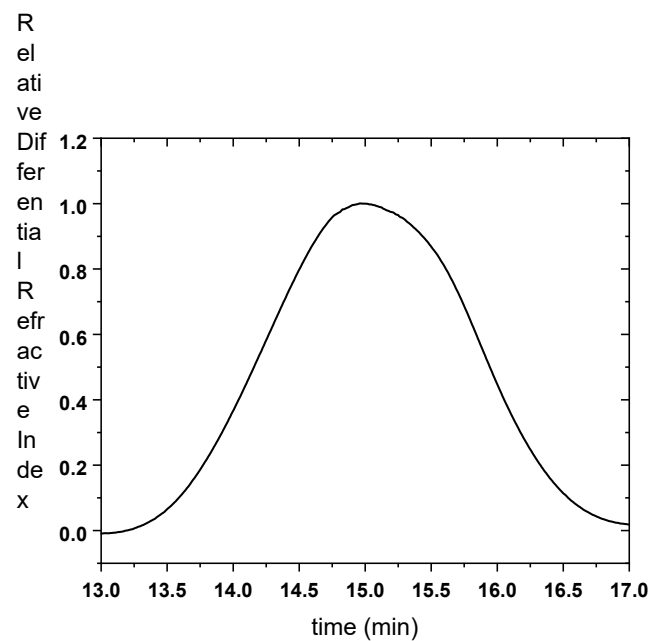

**Figure S4.** GPC multiangle laser light scattering (MALLS) curve of the uncrosslinked PDMS bottlebrush polymer in THF

**Table S2.** Architectural parameters for poly (methacrylate) (PMMA), poly (dimethylsiloxane) (PDMS)

| Architectural parameter     | PMMA                 | PDMS                 |
|-----------------------------|----------------------|----------------------|
| Monomer length <sup>1</sup> | 0.25 nm              | 0.31 nm              |
| Kuhn length <sup>1</sup>    | 1.50 nm              | 1.30 nm              |
| Monomer volume <sup>2</sup> | 0.15 nm <sup>3</sup> | 0.13 nm <sup>3</sup> |

**Table S3.** Gel fractions<sup>a</sup> of BBEs and linear chain networks

| BBEs  | Gel fractions | Linear chain networks | Gel fractions |
|-------|---------------|-----------------------|---------------|
| nx=17 | 88.3±1.2 %    | Syl 40                | 85.6±0.5 %    |
| nx=25 | 86.6±0.4 %    | Syl 50                | 83.4±0.2 %    |
| nx=34 | 86.2±0.4 %    | Syl 55                | 84.3±0.9 %    |

a. Gel fractions were determined from more than five samples prepared over multiple dates to confirm repeatability of sample preparations.

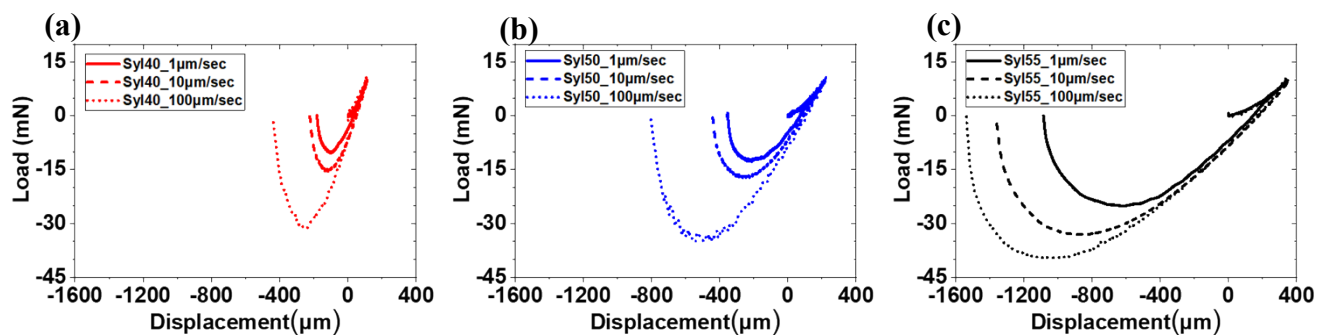

**Figure S5.** Load-displacement curves of linear chain networks with different displacement rates (1, 10, and 100  $\mu\text{m}/\text{sec}$ )

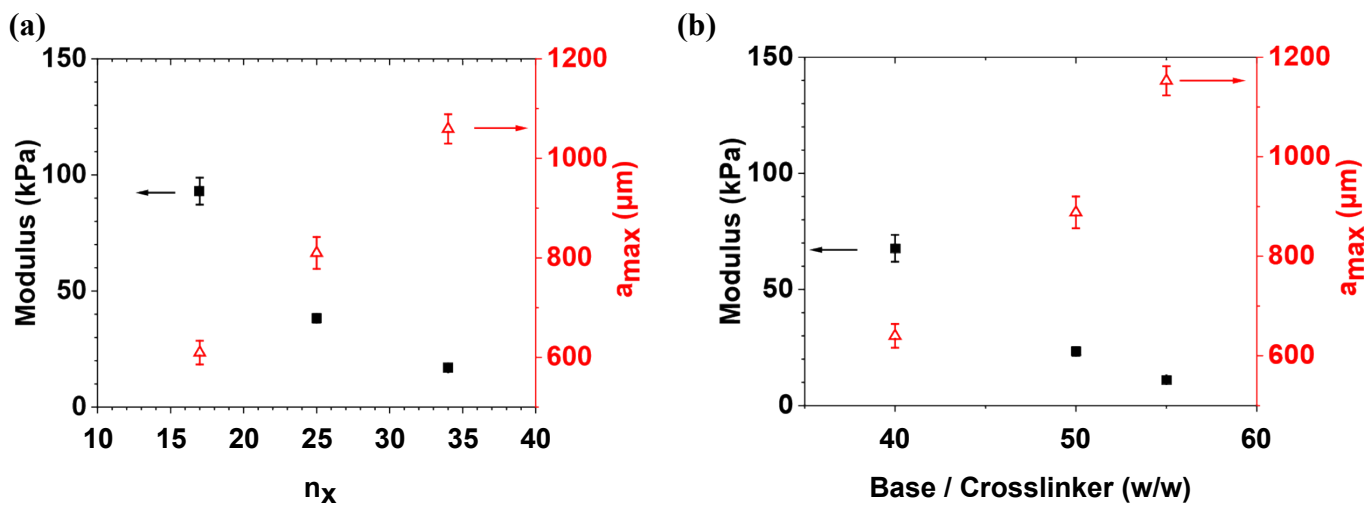

**Figure S6.** Elastic moduli and maximum contact radii of (a) BBEs and (b) linear chain networks from CAT measurements with a displacement rate of 10  $\mu\text{m}/\text{sec}$

• **Calculation of energy release rate,  $G_{cc}$**

$$G_{cc} = - \frac{(PP' - PP)^2}{4\pi\pi\pi\pi} \frac{ddddd}{dd\pi\pi} \quad (\text{Eq S1})$$

where  $PP'$  is the force in the absence of adhesion,  $PP$  is the force,  $aa$  is the contact radius, and  $CC$  is the compliance. To account for the confined geometry,  $PP'$ ,  $\delta\delta'$  (displacement in the absence of adhesion), and  $CC$  have correction factors.<sup>3</sup>

$$PP' = 3 \frac{RR^4(E E 1 - \pi\pi 3\nu\nu^2)}{1 + 0.33(\pi\pi h)^3} \quad (\text{Eq S2})$$

$$\delta' = \frac{\pi\pi^2}{RR} 0.4 + 0.6 \exp \left[ -1.8 \frac{\pi\pi}{h} \right] \quad (\text{Eq S3})$$

$$CC = \frac{(1 - \nu\nu^2)}{1 + \frac{4\pi\pi}{2EE\pi\pi^3} + \frac{4\pi\pi^3 - 1}{3h^3}} \quad (\text{Eq S4})$$

where  $RR$  is the radius of a probe,  $h$  is the thickness of the elastomer, and  $\nu\nu$  is the Poisson's ratio.

$CC$  is determined from the slope of displacement versus force.

$$CC = \frac{\delta\delta' - \delta\delta}{PP' - PP} \quad (\text{Eq S5})$$

**Table S4.**  $E$ ,  $GG_{00}$  and  $\nu\nu^*$  of BBEs from CAT measurements.

| BBEs                | $E$ (kPa) <sup>a</sup> | $GG_{00}$ (J/m <sup>2</sup> ) | $\nu\nu^*$ (μm/sec) |
|---------------------|------------------------|-------------------------------|---------------------|
| n = 17 <sub>x</sub> | 93.0±5.8               | 0.179±0.024                   | 77.74±12.17         |
| n = 25 <sub>x</sub> | 38.3±1.9               | 0.177±0.032                   | 32.55±4.03          |
| n = 34 <sub>x</sub> | 16.9±0.5               | 0.185±0.020                   | 27.13±3.11          |

a.  $E$  were determined when the displacement rate is 10 μm/sec.

**Table S5.**  $E$ ,  $GG_{00}$  and  $\nu\nu^*$  of linear chain networks from CAT measurements

| Linear networks | $E$ (kPa) <sup>a</sup> | $GG_{00}$ (J/m <sup>2</sup> ) | $\nu\nu^*$ (μm/sec) |
|-----------------|------------------------|-------------------------------|---------------------|
| Syl 40          | 67.7±5.3               | 0.484±0.037                   | 4.11±0.40           |
| Syl 50          | 23.2±3.5               | 0.808±0.236                   | 3.65±0.35           |
| Syl 55          | 11.1±1.6               | 1.305±0.301                   | 2.01±0.19           |

a.  $E$  were determined when the displacement rate is 10 μm/sec.



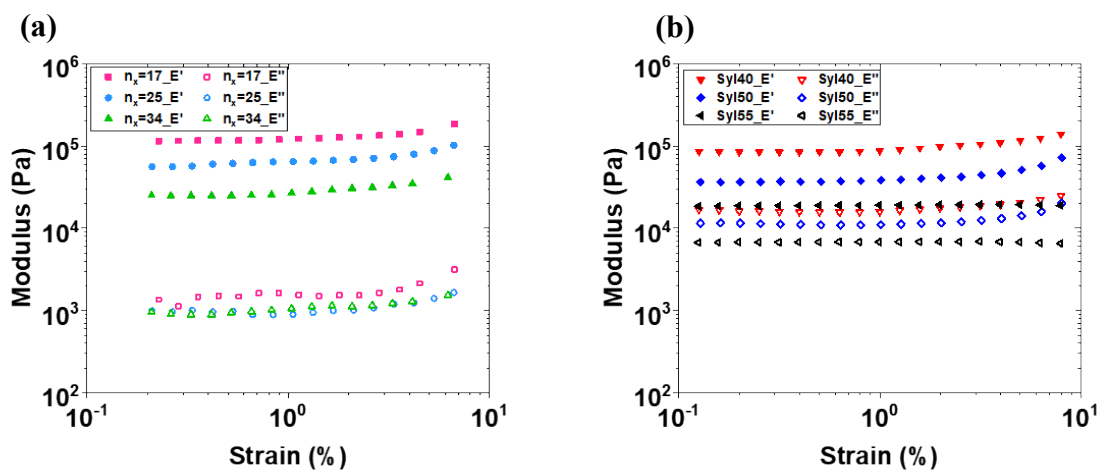

**Figure S7.** Strain dependence of viscoelastic properties of (a) BBEs and (b) linear elastomers at the frequency = 1Hz by DMA at room temperature. Solid data points are elastic storage moduli ( $E'$ ) and open data points are loss moduli ( $E''$ ).

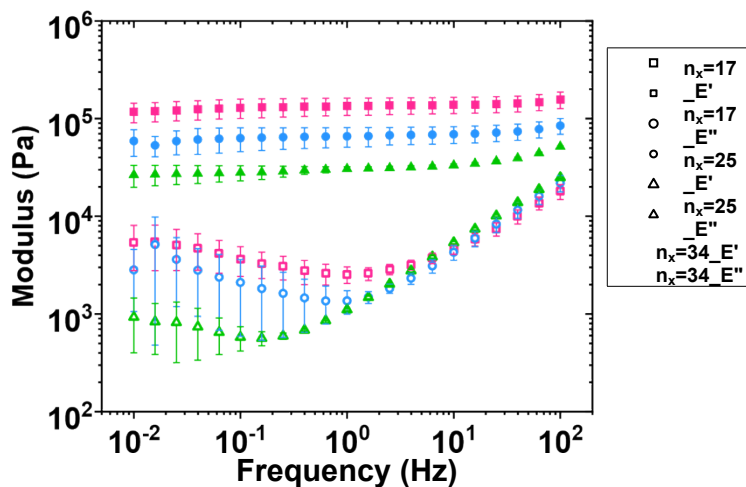

**Figure S8.** Frequency dependence of viscoelastic properties of BBEs at the strain = 1% by DMA at room temperature. Solid data points are elastic storage moduli ( $E'$ ) and open data points are loss moduli ( $E''$ ).

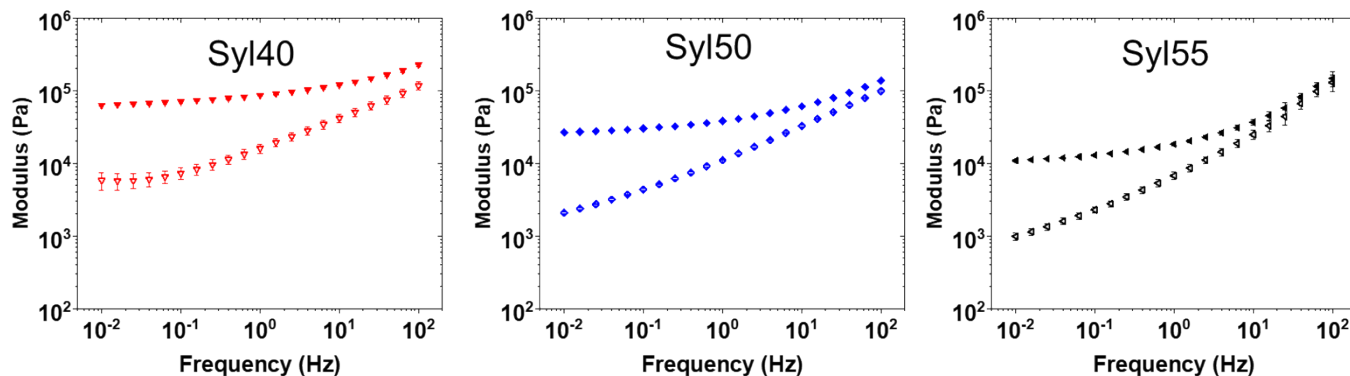

**Figure S9.** Frequency dependence of viscoelastic properties of linear chain networks at the strain = 1% by DMA at room temperature. Solid data points are elastic storage moduli ( $E'$ ) and open data points are loss moduli ( $E''$ ).

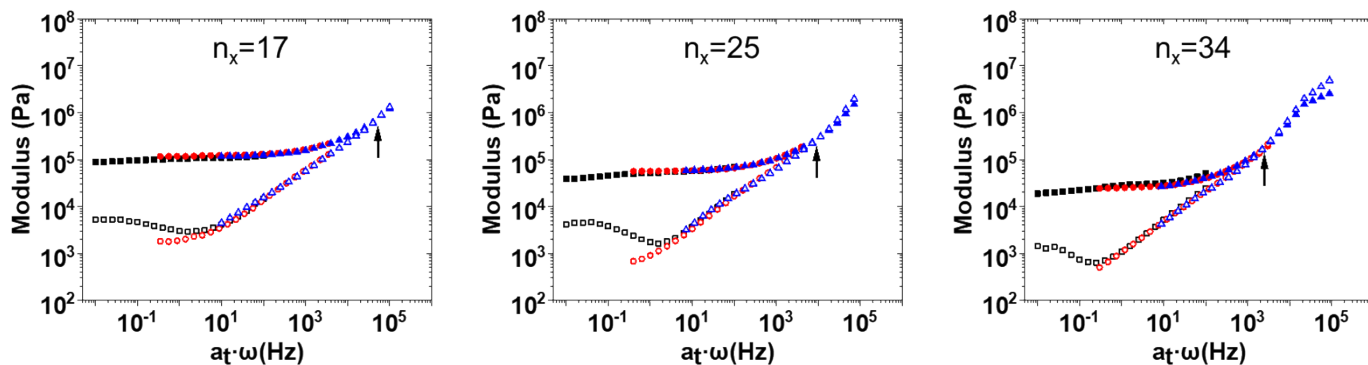

**Figure S10.** Time temperature superposition plots of BBEs at the strain = 1% by DMA at  $\blacksquare = 22\text{ }^\circ\text{C}$ ,  $\bullet = -50\text{ }^\circ\text{C}$ , and  $\blacktriangle = -75\text{ }^\circ\text{C}$ . Solid data points are elastic storage moduli ( $E'$ ), open data points are loss moduli ( $E''$ ). An arrow is the crossing point,  $\omega\omega_{BBB}$ , of  $E'$  and  $E''$ .

**Table S6.** Network relaxation time,  $\tau\tau_{BBB}$ , of BBEs.  $\tau\tau_{BBB}$  were determined as the inverse of

the frequency at the crossing point,  $\omega_{\omega_{BBB}}$ , from **Figure S9**.

| BBEs                | $\omega_{\omega_{BBB}}$ (Hz) | $\tau_{\tau_{BBB}}$ (sec) |
|---------------------|------------------------------|---------------------------|
| n = 17 <sub>x</sub> | 5.50±0.62 E+4                | 1.83±0.20 E-5             |
| n = 25 <sub>x</sub> | 9.00±1.01 E+3                | 1.12±0.13 E-4             |
| n = 34 <sub>x</sub> | 2.40±0.20 E+3                | 4.19±0.35 E-4             |

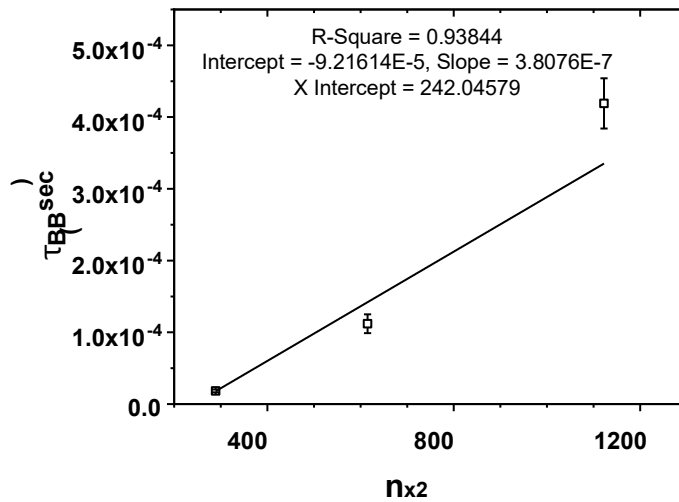

**Figure S11.** A plot of  $\tau_{\tau_{BBB}}$  and  $n_x^2$  of BBEs. The equation of fitting is  $\tau_{\tau_{BBB}} = \tau_{\tau_0} (n_{sc} + 1)^{3/2} n_x^2$  where  $n_{sc}$  is 14 and  $\tau_{\tau_0}$  is the monomer relaxation time.<sup>4</sup>

**Table S7.** Characteristic relaxation time,  $\tau_{\tau_{uuu}}$ , of linear chain networks.  $\tau_{\tau_{uuu}}$  were determined as the inverse of the frequency at the crossing point,  $\omega_{\omega_{uuu}}$ , obtained by extrapolation

from **Figure S8**. Linear fitting lines for  $E'$  and  $E''$  fit well over 1 – 100 Hz with R squared = 0.98 – 0.99 in log-log plots (**Figure S8**). Possible highest and lowest of  $E'$  and  $E''$  were calculated by adding or subtracting the standard deviation from the average.

| Linear networks | $\omega\omega_{uuuu}$ (Hz) | $\tau\tau_{uuuu}$ (sec) |
|-----------------|----------------------------|-------------------------|
| Syl 40          | 4.89±3.25 E+3              | 2.66±1.46 E-4           |
| Syl 50          | 1.02±0.15 E+3              | 9.96±1.39 E-4           |
| Syl 55          | 4.25±5.03 E+2              | 8.22±9.69 E-3           |

## References

1. M. Vatankhah-Varnosfaderani, W. F. Daniel, M. H. Everhart, A. A. Pandya, H. Liang, K. Matyjaszewski, A. V. Dobrynin and S. S. Sheiko, *Nature*, 2017, **549**, 497-501.
2. J. E. Mark, *Physical properties of polymers handbook*, Springer, 2007.
3. K. R. Shull, D. Ahn, W. L. Chen, C. M. Flanigan and A. J. Crosby, *Macromolecular Chemistry and Physics*, 1998, **199**, 489-511.
4. Z. Cao, W. F. Daniel, M. Vatankhah-Varnosfaderani, S. S. Sheiko and A. V. Dobrynin, *Macromolecules*, 2016, **49**, 8009-8017.
